# Supplementary material
Source: Research Square preprint supplement (doi:10.21203/rs.3.rs-9693281/v1)
Supplement: Supplementary file 1 [file 45fc1ad23fe15e8669267780.docx]

**Supplementary Figure S3. SHAP beeswarm plots**


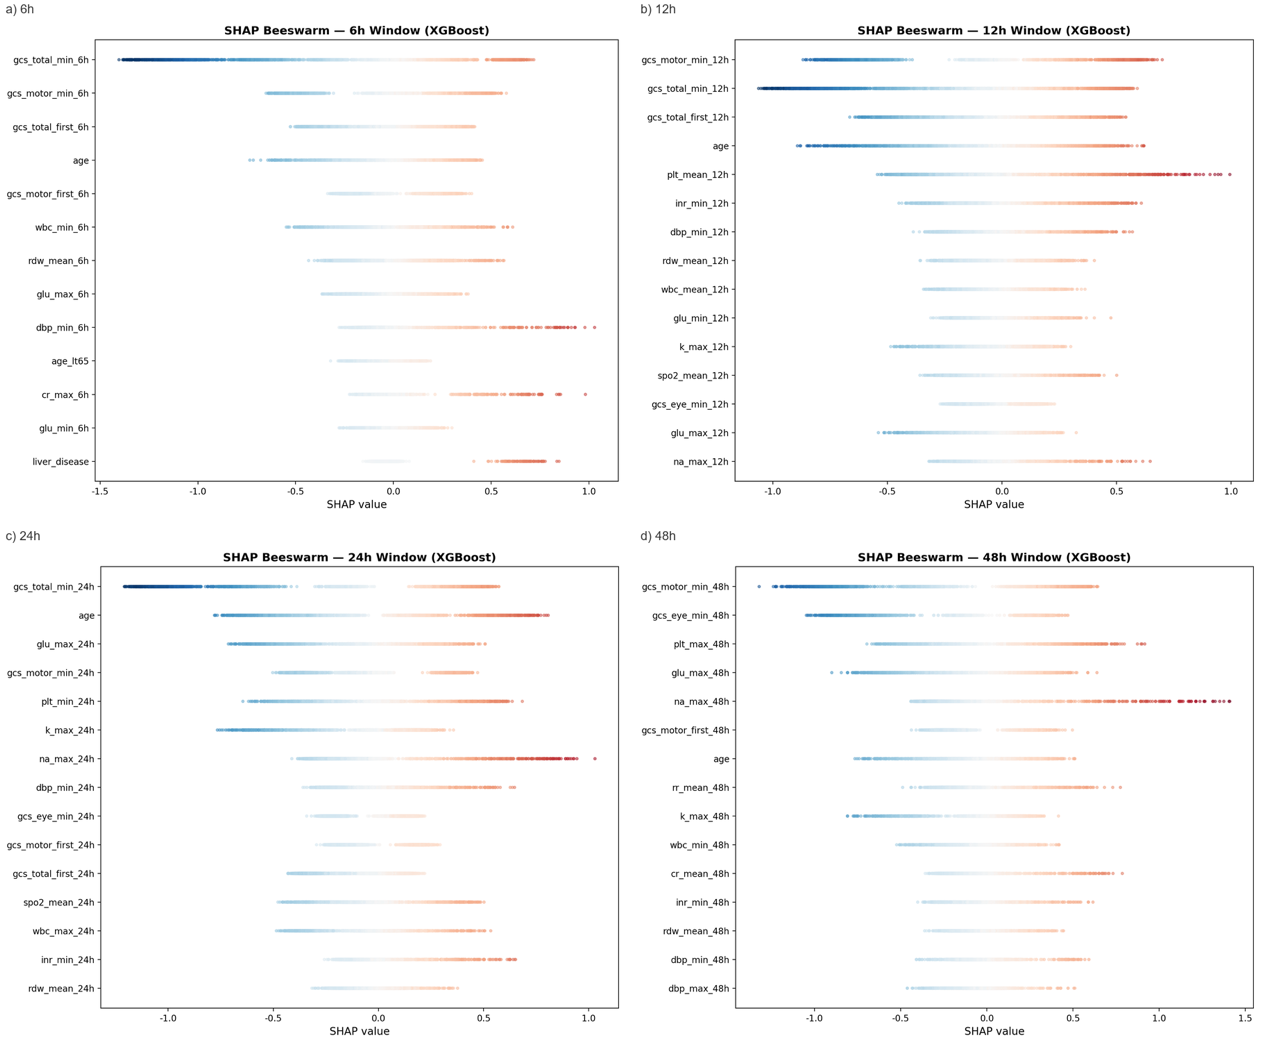


Per-window SHAP value distributions for the top 15 features. Each point = one patient; red = high feature value, blue = low. Horizontal position = SHAP contribution. Complements Figure 3 by showing effect directionality.
