# Supplementary material
Source: Research Square preprint supplement (doi:10.21203/rs.3.rs-9693281/v1)
Supplement: Supplementary file 2 [file 52719b3eb9d2b11168ce3d44.docx]

**Supplementary Table S2. Discriminative performance of LightGBM, Random Forest, and Logistic Regression**

| **Model** | **Time Window** | **AUROC (95% CI)** | **Sensitivity** | **Specificity** |
| --- | --- | --- | --- | --- |
| LightGBM | 6h | 0.857 (0.839–0.873) | 0.790 | 0.782 |
| LightGBM | 12h | 0.865 (0.848–0.881) | 0.723 | 0.832 |
| LightGBM | 24h | 0.853 (0.832–0.871) | 0.712 | 0.815 |
| LightGBM | 48h | 0.853 (0.830–0.873) | 0.677 | 0.844 |
| Random Forest | 6h | 0.854 (0.836–0.870) | 0.758 | 0.806 |
| Random Forest | 12h | 0.861 (0.844–0.878) | 0.751 | 0.809 |
| Random Forest | 24h | 0.853 (0.831–0.870) | 0.740 | 0.807 |
| Random Forest | 48h | 0.846 (0.824–0.867) | 0.667 | 0.828 |
| Logistic Reg. | 6h | 0.854 (0.835–0.871) | 0.788 | 0.774 |
| Logistic Reg. | 12h | 0.869 (0.852–0.885) | 0.809 | 0.773 |
| Logistic Reg. | 24h | 0.860 (0.841–0.877) | 0.799 | 0.749 |
| Logistic Reg. | 48h | 0.856 (0.833–0.876) | 0.796 | 0.765 |

Supplementary comparison of non-primary models. AUROC = area under the receiver operating characteristic curve; 95% CI by DeLong method. Sensitivity and specificity at the optimal threshold by Youden's index. XGBoost results are reported separately in Table 2.
