# Supplementary material
Source: Research Square preprint supplement (doi:10.21203/rs.3.rs-9693281/v1)
Supplement: Supplementary file 5 [file c3729512224714e13d7214dd.docx]

**TRIPOD+AI Checklist**

**Study title:** Multi-Time-Window Landmark Modeling for Dynamic Mortality Prediction in Spontaneous Intracerebral Hemorrhage: A Machine Learning Study Using the MIMIC-IV Database

**Checklist source:** Collins GS, et al. TRIPOD+AI statement: updated guidance for reporting clinical prediction models that use regression or machine learning methods. BMJ. 2024;385:e078378.

*All page numbers refer to the submitted manuscript (Full_Manuscript_final_260512.pdf).*

**Section A: Abstract**

|  |  |  |
| --- | --- | --- |
| 1 | Structured abstract: Background, Methods, Results, Conclusions | 1–2 |

**Section B: Title and Introduction**

|  |  |  |
| --- | --- | --- |
| 2 | Title identifies the study as developing/evaluating a prediction model | 1 |
| 3 | Background: context, existing models, rationale for new model | 3–5 |
| 4 | Study objectives and intended use of the prediction model | 5 |

**Section C: Methods**

|  |  |  |
| --- | --- | --- |
| 5a | Data source (MIMIC-IV v3.1, PhysioNet) | 5 |
| 5b | Eligibility criteria, study design (retrospective cohort) | 5–6 |
| 5c | Details of data collection (ICU admission records from chartevents, labevents, admissions/patients) | 8–9 |
| 6a | How missing data were handled (MICE with Bayesian Ridge; structural vs temporal missingness distinction) | 10–11 |
| 6b | How the data were split (5-fold stratified cross-validation for LASSO and model evaluation) | 12, 14 |
| 7 | Dates of data collection (2008–2019) | 5 |
| 8a | Number of participants (n=2,298) | 5–6 |
| 8b | Number of outcome events (in-hospital mortality 23.8%, 547/2,298 overall; 533 at 6h landmark) | 5–6 |
| 8c | Characteristics of participants (Table 1: demographics, comorbidities, vital signs, GCS, laboratory values) | 6–7 |
| 9a | Outcome definition (in-hospital mortality defined as death during index hospital admission) | 5–6 |
| 9b | How outcome was defined and measured (ICD-9-CM code 431, ICD-10-CM codes I61.0-I61.9) | 5–6 |
| 9c | Outcome blinding not applicable (retrospective EMR data) | – |
| 10a | Candidate predictors and their categories (87 initial variables: demographics, comorbidities, vital signs, GCS components, laboratory values; reduced to 42 after pre-screening) | 8–11 |
| 10b | How predictors were measured (MIMIC-IV structured tables: icu.chartevents for vitals/GCS, hosp.labevents for labs, ICD-coded records for comorbidities; summary stats per window: mean/min/max/first) | 8–9 |
| 10c | Pre-processing (physiological range filtering at SQL level; Winsorization at 1st/99th percentile; SpO2 artifact exclusion <50%) | 9–10 |
| 10d | Predictors in final models (LASSO 1-SE selected: 13/22/20/22 features per window; 7 cross-window stable features identified via set intersection) | 11–12 |
| 10e | Predictor time window (4 landmark windows: 6h, 12h, 24h, 48h after ICU admission; conditioning on survival to landmark) | 5, 8 |
| 11a | Sample size (n=2,298 with 533–547 outcome events across windows; EPV >10 satisfied) | 5–6 |
| 11b | Sample size justification (DL exclusion due to n<40k; grid search without nested CV aligned with ICH ML literature) | 13 |
| 12a | Missing data described (Table S1: per-window missing rates; Table 1 footnotes; albumin excluded at 74.2% missing) | 10, S1 |
| 12b | Structural vs temporal missingness distinction (structural=albumin/database-level absence; temporal=early-window pre-analytical gap for labs) | 10–11 |
| 12c | Missing data method (Multiple Imputation by Chained Equations/MICE with Bayesian Ridge, scikit-learn IterativeImputer max_iter=10; mode imputation for categorical variables) | 11 |
| 13a | Model development: XGBoost (primary), LightGBM (sensitivity), Random Forest (tree baseline), Logistic Regression (traditional baseline) | 12–14 |
| 13b | Model type specification and hyperparameters (XGBoost/LightGBM: two-stage grid search optimizing AUROC; RF: n_estimators=200/max_depth=6; LR: L2 regularization C=1.0/lbfgs) | 12–13 |
| 13c | Class imbalance handling (scale_pos_weight set to inverse class ratio n_neg/n_pos ≈3.2–3.9; class_weight='balanced' for RF/LR) | 12–13 |
| 13d | Feature selection (Stage 1: evidence-based pre-screening 87→42 candidates; Stage 2: LASSO with 5-fold stratified CV + 1-SE rule; composite indices ePVS/GPR/PWR evaluated but eliminated) | 11–12 |
| 14a | Internal validation (5-fold stratified cross-validation with out-of-fold predictions; no external validation performed) | 14, 31 |
| 14b | Evaluation metrics (AUROC [primary], sensitivity, specificity, PPV, F1 score, accuracy, Brier score at Youden threshold) | 14, 16–17 |
| 14c | Performance with confidence intervals (DeLong method + bootstrap 95% CI with 1,000 resamples for dual validation of uncertainty estimates) | 14, 17 |
| 14d | Model comparison (Discrimination: Figure 1 + Table 2; Calibration: curves Figure 2 + quantitative Table 3 [intercept/slope]; Clinical utility: DCA Figure S4; Interpretability: SHAP bar/beeswarm Figures 3–4 + Table 4) | 16–23 |
| 14e | Sensitivity analysis (LightGBM vs XGBoost: ΔAUROC ≤ 0.011 confirms robustness to GBM implementation choice) | 16 |
| 15a | Any risk groups created? (No; continuous predicted probabilities reported; threshold discussion in Discussion section) | – |
| 15b | Model complexity vs. parsimony (LASSO 1-SE rule selects most parsimonious model within 1 SE of minimum CV-MSE; avoids overfitting) | 12 |

**Section D: Results**

|  |  |  |
| --- | --- | --- |
| 16a | Flow of participants (ICD-based identification; first ICU admission included; 2,298 final cohort; landmark conditioning described in Methods; see Additional file 3: Figure S1 flow diagram) | 5–6, Fig S1 |
| 16b | Characteristics and missing data (Table 1: 6h landmark cohort n=2,279; valid n and missing % columns for each variable) | 6–7 |
| 16c | Comparison of included vs. excluded (landmark conditioning on survival explained; progressive denominator decline justified as correct clinical question definition) | 8, 30–31 |
| 17 | Model specification (Table 2: XGBoost full metrics; Table 3: calibration metrics all 4 models; hyperparameters detailed in Methods Section C) | 16–19 |
| 18 | Feature selection results (Window-specific feature counts: 6h=13, 12h=22, 24h=20, 48h=22; 32 unique LASSO-selected features total; composite indices eliminated) | 12 |
| 19a | Discrimination (XGBoost AUROC: 0.856/0.872/0.864/0.857 at 6/12/24/48h; inverted-U trajectory peaking at 12h consistent across all 4 models; Figure 1 error bars) | 16–17 |
| 19b | Calibration (Curves: Figure 2 decile plots; Quantitative: slopes 0.90–0.98, intercepts −0.81 to −1.07; modest overestimation noted; Table 3 full metrics) | 17–19 |
| 19c | Clinical utility (DCA: positive net benefit across ~10–40% thresholds at all windows; above both default strategies; Additional file 6: Figure S4; Youden threshold discussion) | 23 |
| 19d | SHAP feature importance (Table 4: mean |SHAP| heatmap 32 features × 4 windows; Figure 3: cross-window SHAP heatmap; Figure 4: temporal trajectory line plot; 7 cross-window stable features; neurological→metabolic shift) | 19–22 |
| 20 | Model interpretation and intended clinical use (Three-phase clinical interpretation: 6h insufficient, 12h optimal decision point, 24–48h shift to systemic complications; dynamic vs static framework advantages) | 23–30 |
| 21 | Comparison with existing models (Mao 2024: 0.907 with treatment variables/collider bias; Chen 2025: 0.797 with external validation; Ye 2026: 0.851 with biomarkers; Britsch 2025: recursive updating; our difference: multi-window + treatment exclusion) | 24–26 |
| 22 | Strengths (Multi-time-window landmark design; dual CI methodology [DeLong+Bootstrap]; quantitative calibration metrics; SHAP temporal evolution; collider bias awareness; clinical interpretability focus) | 23–25 |
| 23 | Limitations (No external validation; single-center BIDMC retrospective; no imaging features [hematoma volume/IVH/midline shift]; treatment variables excluded [causal inference planned]; DL not employed; grid search without nested CV) | 31–32 |

**Section E: Supplementary**

|  |  |  |
| --- | --- | --- |
| 24 | Supplementary materials (Additional file 1: Table S1 [per-window missing]; Additional file 2: Table S2 [all model performance]; Additional file 3: Figure S1 [participant flow]; Additional files 4–7: Figures S2–S4 [SHAP plots/DCA]) | Supplementary |
| 25 | Data availability statement (MIMIC-IV v3.1 publicly available via PhysioNet requiring CITI training + DUA; analysis code available upon acceptance; requests during review directed to corresponding author) | 35 |
