# Supplementary material
Source: Research Square preprint supplement (doi:10.21203/rs.3.rs-9693281/v1)
Supplement: Supplementary file 6 [file d98ffb40f7d419acc8729517.docx]

**Supplementary Table S1. Dynamic comparison of key clinical features across four landmark time windows**

| **Variable** | **6h Median [IQR]** | **6h Miss %** | **12h Median [IQR]** | **12h Miss %** | **24h Median [IQR]** | **24h Miss %** | **48h Median [IQR]** | **48h Miss %** |
| --- | --- | --- | --- | --- | --- | --- | --- | --- |
| **Cohort size, n** | 2279 | - | 2222 | - | 1982 | - | 1537 | - |
| **Mortality, n (%)** | 533 (23.4) | - | 498 (22.4) | - | 423 (21.3) | - | 313 (20.4) | - |
| Heart rate, bpm | 85.6 [77.0–95.6] | 0.4 | 84.5 [76.1–94.1] | 0.1 | 85.0 [76.8–93.2] | 0.1 | 85.5 [78.0–93.3] | 0.1 |
| SBP, mmHg | 130.4 [120.2–140.4] | 0.8 | 129.5 [119.8–138.2] | 0.5 | 130.1 [121.3–138.1] | 0.4 | 131.4 [123.6–139.4] | 0.2 |
| DBP, mmHg | 69.3 [61.0–77.8] | 0.9 | 68.1 [60.3–76.3] | 0.5 | 68.0 [60.6–75.9] | 0.4 | 68.4 [60.6–75.7] | 0.2 |
| SpO₂, % | 96.2 [94.1–98.0] | 0.4 | 96.2 [94.3–97.8] | 0.1 | 96.2 [94.5–97.7] | 0.2 | 96.1 [94.6–97.5] | 0.2 |
| GCS total, first | 12.0 [7.0–15.0] | 1.9 | 12.0 [7.0–15.0] | 1.4 | 12.0 [7.0–15.0] | 1.6 | 11.0 [7.0–14.0] | 1.7 |
| GCS eye, first | 3.0 [1.0–4.0] | 0.8 | 3.0 [1.0–4.0] | 0.3 | 3.0 [1.0–4.0] | 0.3 | 3.0 [1.0–4.0] | 0.3 |
| GCS verbal, first | 3.0 [1.0–5.0] | 1.1 | 3.0 [1.0–5.0] | 0.6 | 2.0 [1.0–5.0] | 0.9 | 2.0 [1.0–5.0] | 1.1 |
| GCS motor, first | 6.0 [4.0–6.0] | 1.7 | 6.0 [4.0–6.0] | 1.1 | 6.0 [4.0–6.0] | 1.2 | 6.0 [4.0–6.0] | 1.3 |
| WBC, ×10⁹/L | 10.5 [8.2–13.6] | **40.1** | 10.5 [8.2–13.3] | 16.7 | 10.6 [8.2–13.3] | 5.4 | 10.8 [8.8–13.4] | 1.7 |
| Platelet, ×10⁹/L | 209.0 [164.0–262.0] | **39.9** | 209.0 [166.5–262.0] | 16.6 | 207.0 [165.0–259.1] | 5.5 | 201.6 [160.5–249.0] | 1.8 |
| INR | 1.1 [1.1–1.3] | **43.7** | 1.1 [1.1–1.3] | 23.9 | 1.1 [1.1–1.3] | 14.2 | 1.1 [1.1–1.2] | 7.7 |
| Glucose, mg/dL | 131.0 [109.0–164.0] | **38.1** | 129.0 [109.0–158.0] | 15.2 | 130.0 [110.0–155.6] | 5.0 | 130.0 [112.2–155.0] | 1.6 |
| Creatinine, mg/dL | 0.9 [0.7–1.1] | **38.0** | 0.9 [0.7–1.1] | 15.0 | 0.9 [0.7–1.1] | 5.0 | 0.8 [0.7–1.1] | 1.6 |
| BUN, mg/dL | 16.0 [12.0–22.0] | **37.9** | 16.0 [12.0–21.5] | 14.9 | 15.7 [12.0–21.0] | 5.0 | 15.6 [11.9–21.0] | 1.6 |
| Hemoglobin, g/dL | 12.5 [11.1–13.7] | **40.0** | 12.4 [11.1–13.7] | 16.7 | 12.3 [11.0–13.5] | 5.4 | 12.1 [10.8–13.3] | 1.7 |
| Sodium, mmol/L | 139.0 [137.0–142.0] | **36.0** | 139.7 [137.0–142.0] | 13.9 | 140.0 [137.5–142.0] | 4.6 | 140.5 [138.0–143.0] | 1.6 |
| RDW, % | 13.7 [13.0–14.6] | **40.1** | 13.7 [13.0–14.6] | 16.7 | 13.7 [13.0–14.6] | 5.5 | 13.8 [13.1–14.6] | 1.7 |

Data presented as median [interquartile range]. Missing percentages reflect pre-MICE availability within each landmark window. GCS total = eye + verbal + motor component scores. Bold red missing rates (>30%) at 6h highlight temporal missingness — these values decline to <25% by 12h and <15% by 24h, supporting the decision to retain temporally missing variables and handle them via MICE imputation.
