# Supplementary material
Source: Research Square preprint supplement (doi:10.21203/rs.3.rs-9693281/v1)
Supplement: Supplementary file 7 [file de2d49017b1554812f975363.docx]

**Supplementary Figure S2. SHAP bar plots across four landmark windows**


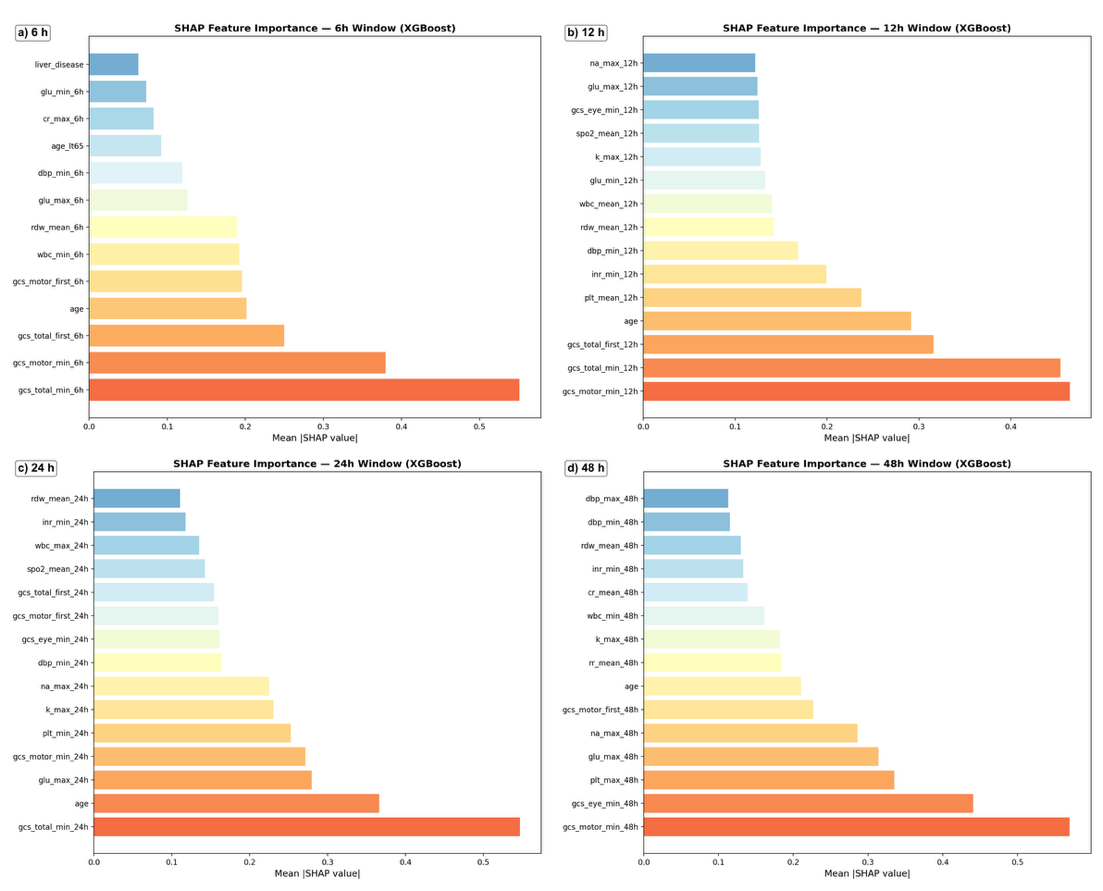


Per-window mean |SHAP| bar plots for all LASSO-selected features. Four panels: a) 6h, b) 12h, c) 24h, d) 48h. Complements the heatmap display in Figure 3 by showing the complete feature importance ranking within each window.
